# Supplementary material
Source: ML conference proceedings conference paper supplement (https://openaccess.thecvf.com/content/ICCV2023/html/Svitov_DINAR_Diffusion_Inpainting_ICCV_2023_paper.html)
Supplement: Supplementary file 2 [file Svitov_DINAR_Diffusion_Inpainting_ICCV_2023_supplemental.zip]

Archive with 2 entries (2 files):
- DINAR.mp4
- supplementary.pdf
